# Supplementary material for: Selection for longer limbs in mice increases bone stiffness and brittleness, but does not alter bending strength
Source: Oxford University Press journal article supplement (doi:10.1242/jeb.203125), 2019-01-01
Supplement: jeb203125supp.pdf [file jeb203125supp.pdf]

**Dataset 1.** Raw data for all shape, cross-sectional, strength and ash analyses.

[Click here to Download Dataset 1](#)
